# Supplementary material for: Pt/Pd Decorate MOFs Derived Co-N-C Materials as High-Performance Catalysts for Oxygen Reduction Reaction
Source: MDPI journal article supplement (doi:10.3390/catal12050482), 2022-04-25
Supplement: s1 [file s1]

**Pt/Pd decorate MOFs derived Co-N-C materials as high-performance catalysts**  
**for oxygen reduction reaction**

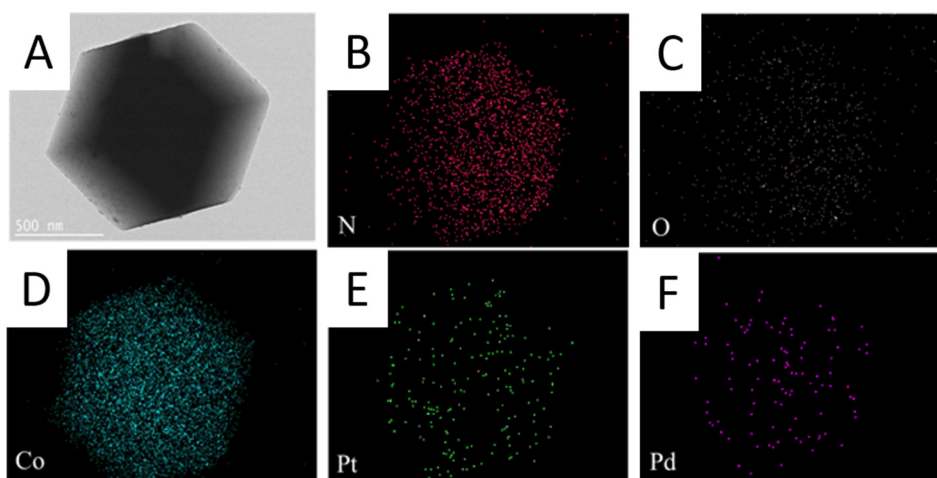

Figure S1. TEM of Pt/Pd/Co-N-C(A) and EDS mapping of N, O, Co, Pt, and Pd(B-F).

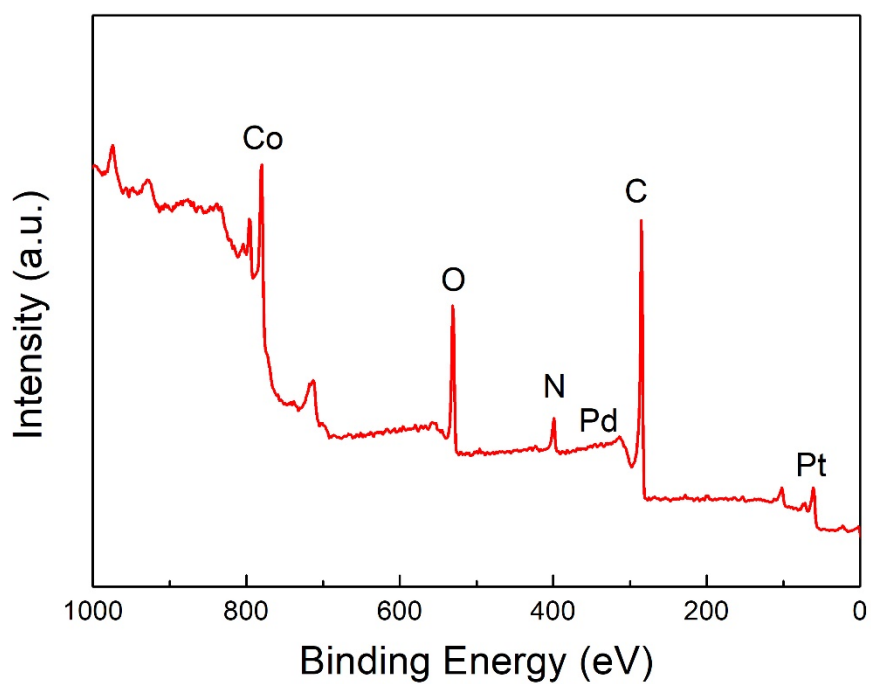

Figure S2. XPS surveys of Pt/Pd/Co-N-C

Table S1 Atomic content of Pt/Pd/Co-N-C

| element | Content(at%) |
|---------|--------------|
| C       | 70.55        |
| N       | 6.97         |
| O       | 15.58        |
| Co      | 6.63         |

|    |      |
|----|------|
| Pt | 0.16 |
| Pd | 0.12 |

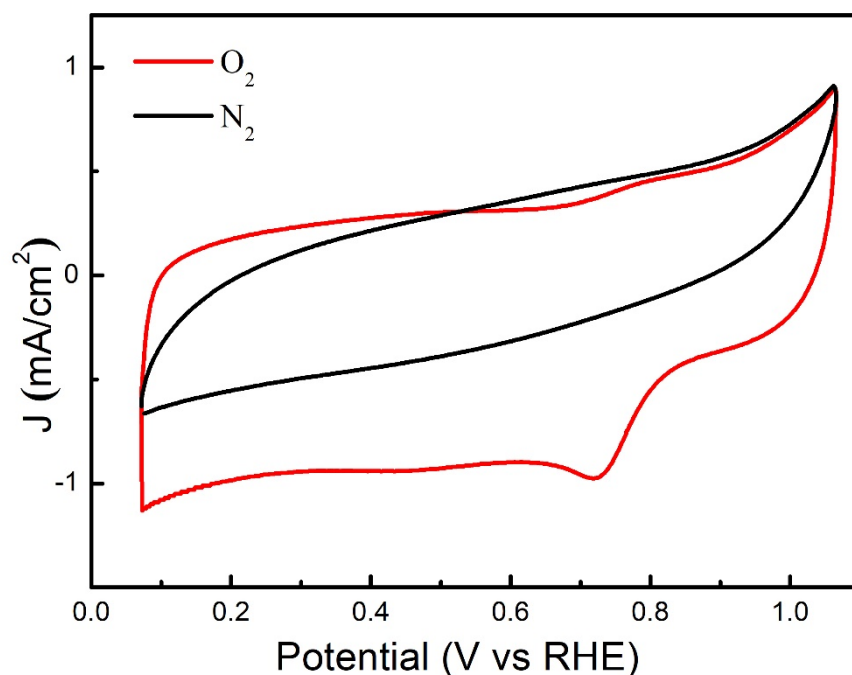

Figure S3. CVs on Pt/Pd/Co-N-C in N<sub>2</sub> and O<sub>2</sub> saturated 0.1 M KOH solution.

Table S2. ORR activity data from different catalysts

| Catalyst                           | $E_{1/2}/V$ | $E_j(\text{mA cm}^{-2})$ | Tafel Slope( $\text{mV dec}^{-1}$ ) | Ref.      |
|------------------------------------|-------------|--------------------------|-------------------------------------|-----------|
| Pd@Zn                              | 0.82        | 6.07                     | 58                                  | [1]       |
| Pt <sub>2</sub> Pd <sub>1</sub>    | 0.889       | 5.9                      | 90                                  | [2]       |
| Zn-Co-ZIF/GO-920                   | 0.807       | 6.23                     | 51                                  | [3]       |
| NGQDS <sub>140</sub> -PtPd         | 0.87        | 5.66                     | 77                                  | [4]       |
| Pd <sub>4.7</sub> RuNPs/NrGO       | 0.792       | 6.3                      | Not report                          | [5]       |
| Pt <sub>50</sub> Pd <sub>50</sub>  | 0.92        | 6.6                      | 73.2                                | [6]       |
| Pd <sub>9</sub> Ru <sub>1</sub> /C | 0.86        | 5.7                      | 76.75                               | [7]       |
| Co-N-C                             | 0.82        | 4.4                      | 78                                  | This work |
| Pd/Co-N-C                          | 0.81        | 5.4                      | 74                                  | This work |
| Pt/Co-N-C                          | 0.81        | 5.9                      | 86                                  | This work |
| Pt/C                               | 0.84        | 5.8                      | 72                                  | This work |
| Pt/Pd/Co-N-C                       | 0.84        | 6.6                      | 74                                  | This work |

1. Yang, H.; Wang, K.; Tang, Z.; Liu, Z.; Chen, S. Bimetallic PdZn nanoparticles for oxygen reduction reaction in alkaline medium: The effects of surface structure. *J. Catal.* **2020**, *382*, 181–191.
2. Lyu, X.; Zhang, W.-N.; Li, G.; Shi, B.-W.; Zhang, Y.-N.; Chen, H.; Li, S.-C.; Wang, X. Two-Dimensional Porous PtPd Nanostructure Electrocatalysts for Oxygen Reduction Reaction. *ACS Appl. Nano Mater.* **2020**, *3*, 8586–8591.
3. Zhu, Z.; Chen, C.; Cai, M.; Cai, Y.; Ju, H.; Hu, S.; Zhang, M. Porous Co-N-C ORR catalysts of high performance synthesized with ZIF-67 templates. *Materials Research Bulletin*, **2019**, *114*: p. 161-169.
4. Liu, S.; Wang, W.; Hu, Y.; Tian, F.; Miao, X.; Liu, L.; Xu, Z. Hetero-Shaped coral-like catalysts through metal-support interaction between nitrogen-doped graphene quantum dots and PtPd alloy for oxygen reduction reaction. *Electrochim. Acta* **2020**, *364*, 137314.
5. Park, G.-R.; Jo, S.G.; Varyambath, A.; Kim, J.; Lee, J.W. Nitrogen-Doped Reduced Graphene Oxide Supported Pd<sub>4.7</sub>Ru Nanoparticles Electrocatalyst for Oxygen Reduction Reaction. *Nanomaterials*, **2021**, *11*(10).

6. Zhang, Y.; Zhao, L.; Walton, J.; Liu, Z.; Tang, Z. Facile fabrication of PtPd alloyed worm-like nanoparticles for electrocatalytic reduction of oxygen. *International Journal of Hydrogen Energy*, 2017. 42(27): p. 17112-17121.
7. Zhang, Y.; Zhu, W.; Liao, F.; Jiang, B.; Yang, J.; Ma, M.; Shao, C.; Shao, M. Interfacial engineered PdRu/C with robust poison tolerance for oxygen reduction reaction and zinc-air battery. *Journal of Alloys and Compounds*, 2022. 896: p. 163112.
